# Supplementary material
Source: Elsevier journal article supplement (https://www.sciencedirect.com/science/article/pii/S0214916821000413)

**Power of sample size according to left main % stenosis using (mean ± SD) of study subgroups (vitamin D deficiency subgroup and normal vitamin D level subgroup)**


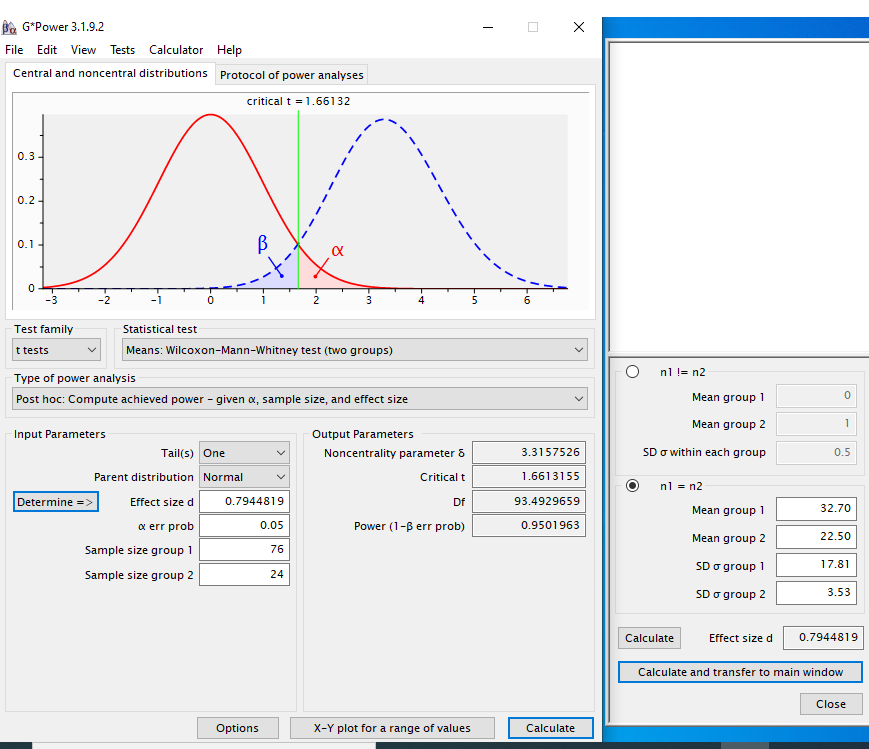


**Power of sample size according to LAD % stenosis using (mean ± SD) of study subgroups (vitamin D deficiency subgroup and normal vitamin D level subgroup)**

**
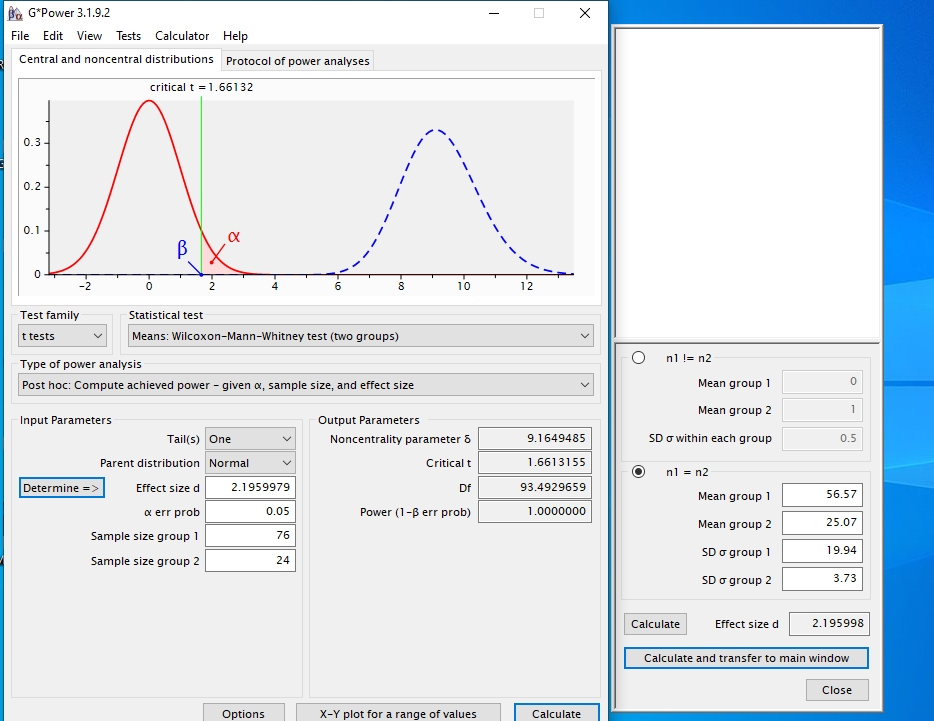
**

**Power of sample size according to LCX % stenosis using (mean ± SD) of study subgroups (vitamin D deficiency subgroup and normal vitamin D level subgroup)**


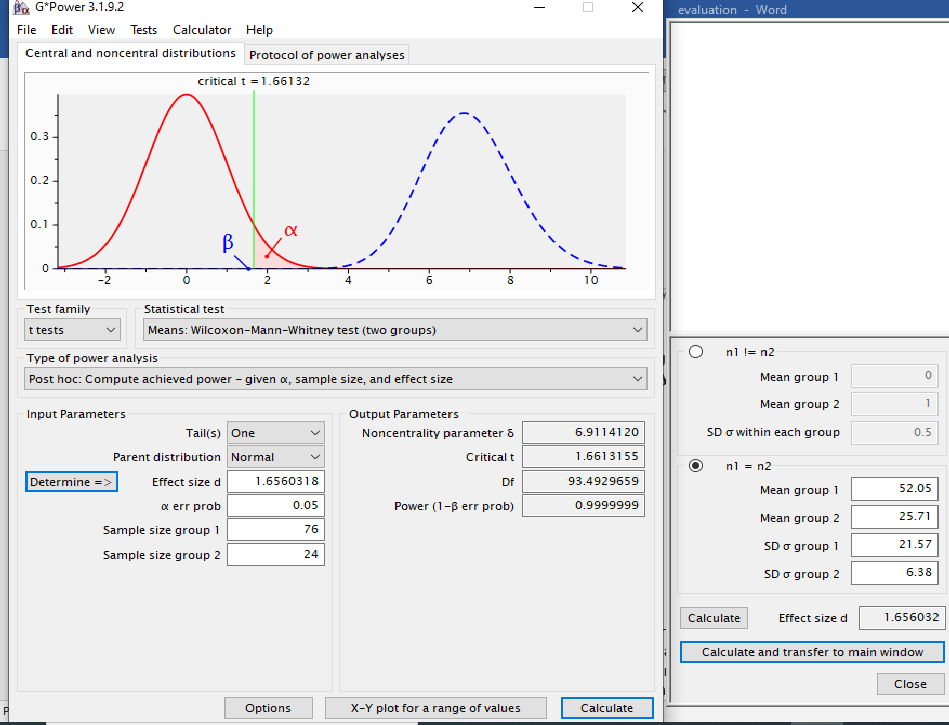


**Power of sample size according to RCA % stenosis using (mean ± SD) of study subgroups (vitamin D deficiency subgroup and normal vitamin D level subgroup)**


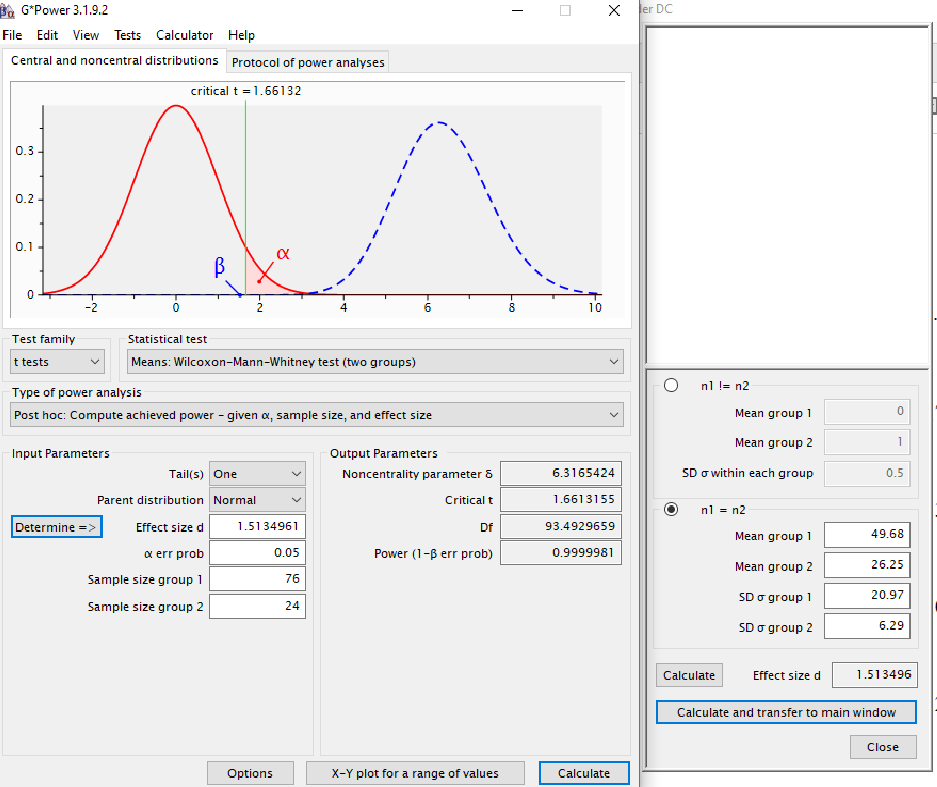

Supplement: mmc1 [file S0214916821000413:mmc1.doc]
